# Supplementary material for: The mitochondrial genome ofAcrobeloides varius(Cephalobomorpha) confirms non-monophyly of Tylenchina (Nematoda)
Source: PeerJ journal article supplement (doi:10.7717/peerj.9108), 2020-05-13
Supplement: Supplemental_Figure_S2.pdf [file Supplemental_Figure_S2.pdf]

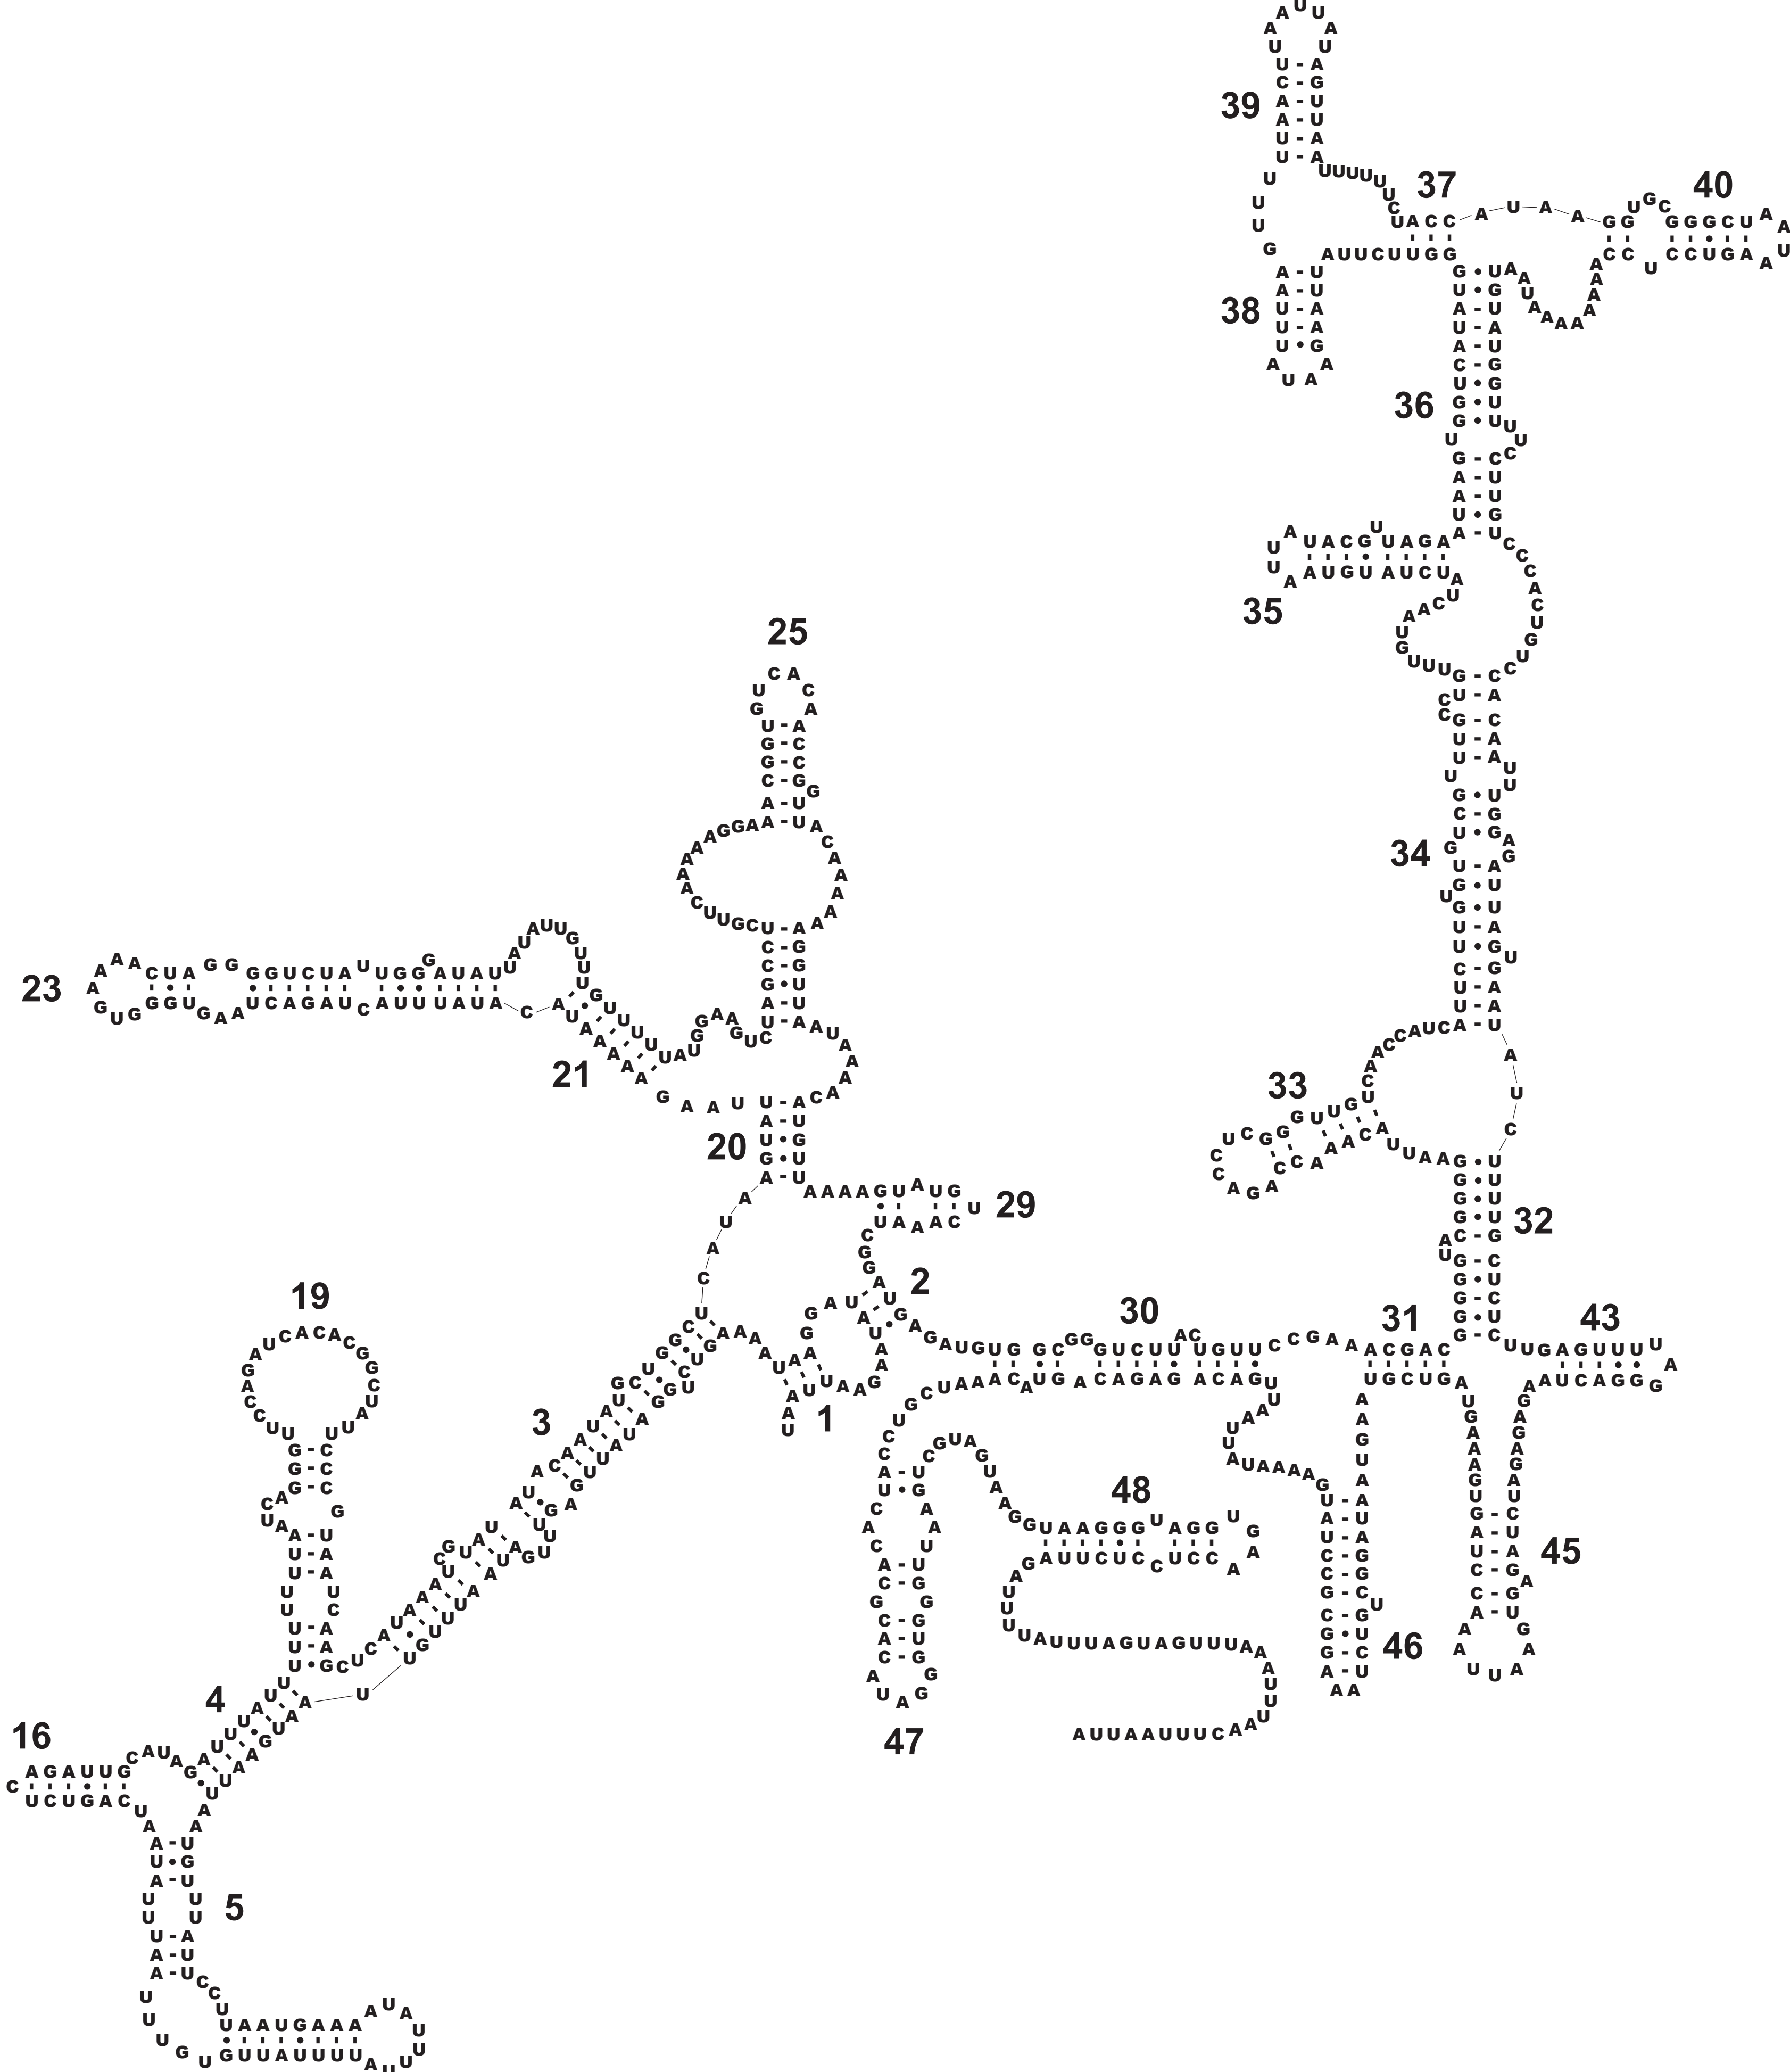

23

16

5

19

21

20

25

3

1

47

2

29

48

30

33

38

35

39

31

46

34

36

37

32

45

43

40
