# Supplementary material for: The mitochondrial genome ofAcrobeloides varius(Cephalobomorpha) confirms non-monophyly of Tylenchina (Nematoda)
Source: PeerJ journal article supplement (doi:10.7717/peerj.9108), 2020-05-13
Supplement: Supplemental_Figure_S7.pdf [file Supplemental_Figure_S7.pdf]

# Chromadorea

# Enoplea

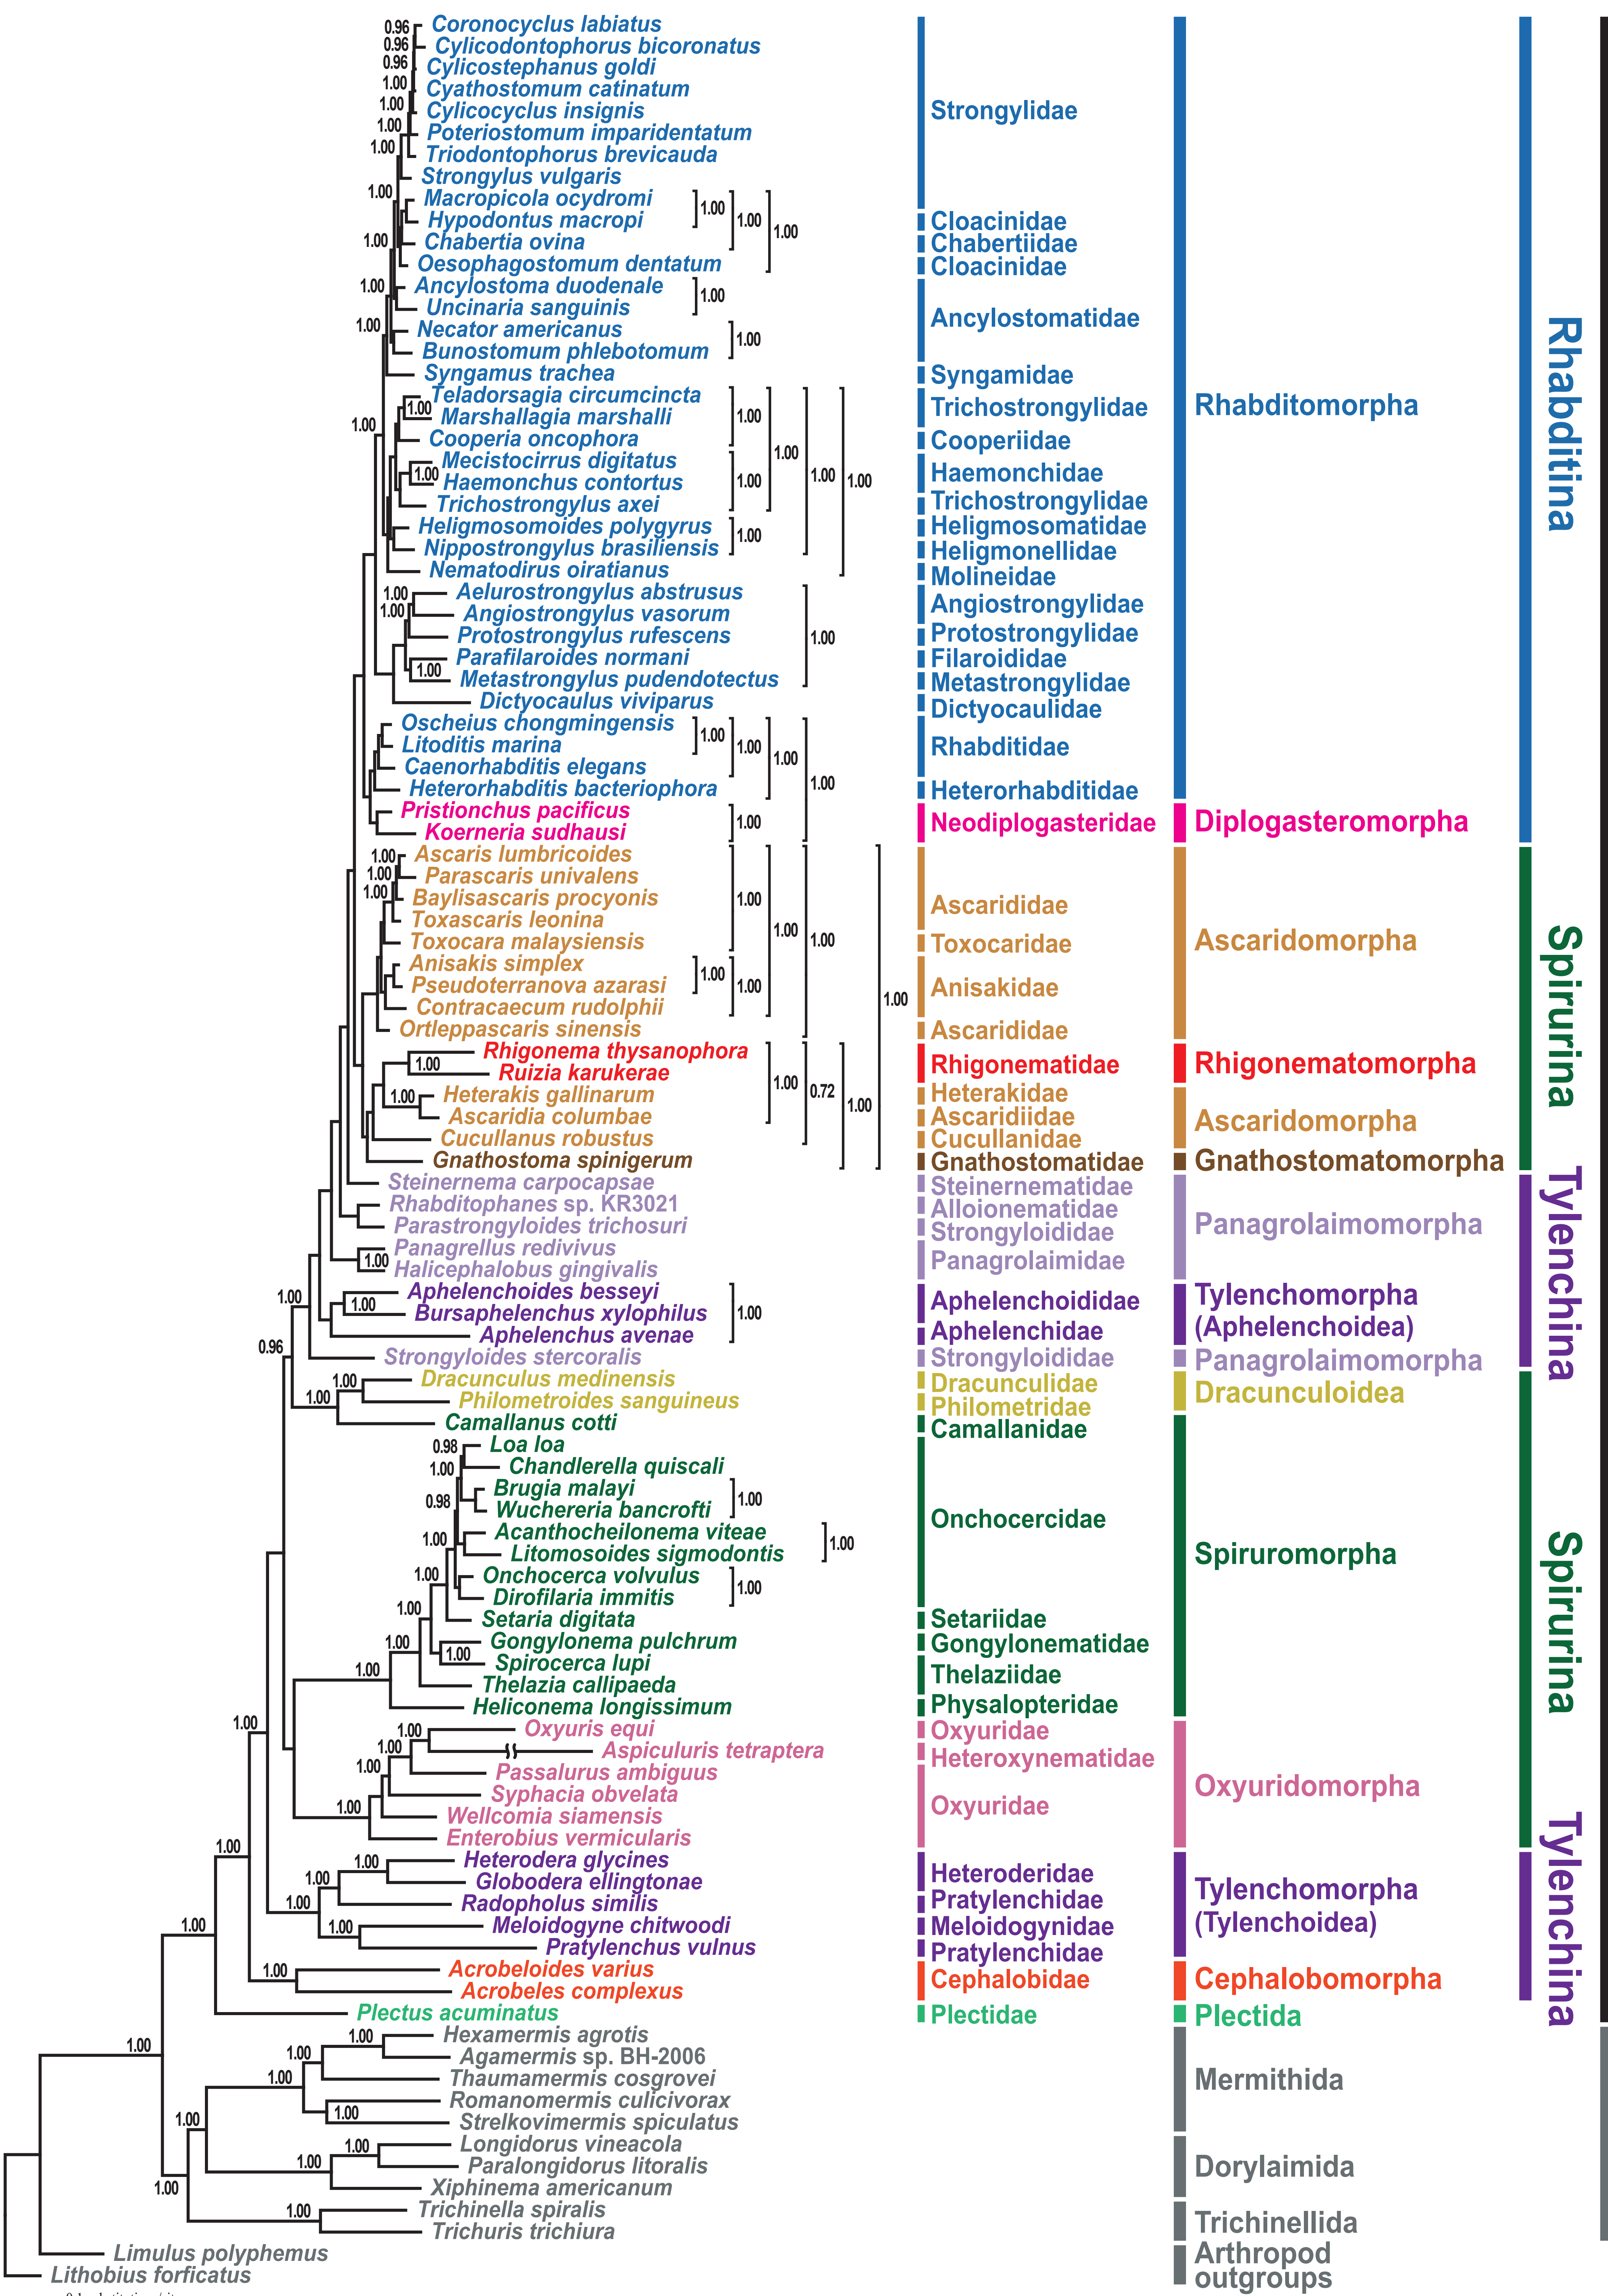

— 0.1 substitutions/site
